# Supplementary material for: Loss of height predicts total and cardiovascular mortality: a cohort study of northern European women
Source: PubMed Central journal article supplement (PMC8404445; doi:10.1136/bmjopen-2021-049122), 2021-08-09
Supplement: bmjopen-2021-049122supp001.pdf [file bmjopen-2021-049122supp001.pdf]

**Supplemental table S1.** Hazard ratios<sup>a</sup> and 95% confidence intervals for the association between height loss and total mortality in age-stratified samples of Swedish and Danish women (n=2406).

|                                                             | Total mortality      |                   |                         |                   |
|-------------------------------------------------------------|----------------------|-------------------|-------------------------|-------------------|
|                                                             | Model 1 <sup>b</sup> |                   | Model 2 <sup>c, d</sup> |                   |
|                                                             | < 50 years           | ≥ 50 years        | < 50 years              | ≥ 50 years        |
| <b>Pooled sample stratified by baseline age<sup>d</sup></b> |                      |                   |                         |                   |
| No. of cases/censored <sup>a</sup>                          | 157/1183             | 468/598           | 157/1172                | 467/597           |
| Height loss (cm)                                            | 1.14 (0.98, 1.34)    | 1.21 (1.14, 1.29) | 1.14 (0.97; 1.34)       | 1.16 (1.08; 1.23) |
| Height loss (cm), binary:                                   |                      |                   |                         |                   |
| Stable (≤2)                                                 | 1 (reference)        | 1 (reference)     | 1 (reference)           | 1 (reference)     |
| Major height loss (>2)                                      | 1.90 (1.04, 3.46)    | 1.84 (1.48, 2.31) | 2.02 (1.10; 3.68)       | 1.70 (1.36; 2.14) |

<sup>a</sup> Number of deaths since second height measure / censored at end of follow-up. <sup>b</sup> Model 1 adjusted for age at follow-up, age<sup>2</sup>, time interval and height at baseline. <sup>c</sup> Model 2 adjusted for age at follow-up, age<sup>2</sup>, time interval, height at baseline, weight at baseline, baseline smoking, ethanol intake at baseline, baseline education and leisure time physical activity at both baseline and follow-up. <sup>d</sup> Interaction term for continuous height loss\*baseline age, p=0.9. Interaction term for binary height loss\*baseline age, p=0.6.
